# Supplementary material for: Telemedicine Adoption, Pandemic-Related Fear, and Treatment Adherence in Cancer Care During COVID-19: A Prospective Cohort Study
Source: Research Square preprint supplement (doi:10.21203/rs.3.rs-7054766/v1), 2025-08-19
Supplement: Supplementary file 1 [file 0b7d475596c0c543fbdd61cf.docx]

**Supplementary Tables**

**Supplementary Table S1: COVID-19 Impact and Healthcare Utilization**

| Characteristic | n (%) |
| --- | --- |
| Received remote medical advice | 37 (24.8%) |
| Did not receive remote medical advice | 83 (55.70%) |
| No information provided | 29 (19.46%) |
| Appointments postponed during pandemic | 29 (19.46%) |
| Appointments unaffected | 117 (78.52%) |
| Infected with coronavirus at any time | 47 (31.54%) |
| Never infected with coronavirus | 102 (68.45%) |
| Visited emergency room during pandemic | 58 (38.92%) |
| Did not visit emergency room | 91 (61.07%) |
| Laboratory tests near home | 18 (12.08%) |

**Supplementary Table S2: Treatment Modifications and Reasons**

| Characteristic | n (%) |
| --- | --- |
| Received optimal treatment | 89 (59.73%) |
| Possible optimal treatment | 28 (18.79%) |
| Treatment delayed | 32 (21.27%) |
| Reasons for Treatment Delay (n=32) |  |
| - COVID-19 infection | 12 (37.5%) |
| - Other infection | 5 (15.6%) |
| - Neutropenia | 6 (18.7%) |
| - Low cardiac ejection fraction | 2 (6.2%) |
| - Anemia | 3 (9.3%) |
| - Hyperbilirubinemia | 3 (9.3%) |
| - Elevated urea-creatinine | 1 (3.1%) |
